# Supplementary material for: Evaluating the Effectiveness of Deep Learning Contouring across Multiple Radiotherapy Centres
Source: PubMed Central journal article supplement — Phys Imaging Radiat Oncol. 2022 Nov 8;24:121–8. doi: 10.1016/j.phro.2022.11.003 (PMC9668733; doi:10.1016/j.phro.2022.11.003), 2022-11-08
Supplement: mmc1.pdf [file mmc1.pdf]

## Supplementary material

Table S1: Average contouring times for prostate structures 3 centres using manual contouring and deep learning contouring (DLC). Standard errors used. P-value from paired T-test for centres 1 and 4 and for unpaired T-test for centre 2.

|                                                      | Average OAR contouring time (minutes) |          |          |
|------------------------------------------------------|---------------------------------------|----------|----------|
|                                                      | Centre 1                              | Centre 2 | Centre 4 |
| Manual                                               | 15.0±0.7                              | 12.5±0.5 | 31.1±2.4 |
| DLC                                                  | 13.0±1.3                              | 11.5±0.3 | 16.5±2.0 |
| Average time difference<br>(negative is time saving) | -2.0±1.4                              | -1.0±0.6 | 14.7±3.1 |
| p-value                                              | 0.17                                  | 0.09     | <0.01    |

Table S2: Median dice similarity coefficient (DSC) for prostate organs at risk for 2 centres comparing manual contouring and deep learning contouring (DLC). Standard errors used.

| Structure          | DSC       |           |
|--------------------|-----------|-----------|
|                    | Centre 1  | Centre 2  |
| Rectum             | 0.62±0.06 | 0.72±0.03 |
| Bladder            | 0.83±0.02 | 0.93±0.02 |
| Femoral Head Left  | 0.93±0.03 | 0.90±0.11 |
| Femoral Head Right | 0.90±0.04 | 0.92±0.01 |

Table S3: Median distance to agreement (DTA) for prostate organs at risk 2 centres comparing manual contouring and deep learning contouring (DLC). Standard errors used. \*One result excluded for error calculation due to DLC contour being entirely outside the manual contour.

| Structure             | DTA (mm) |          |
|-----------------------|----------|----------|
|                       | Centre 1 | Centre 2 |
| Rectum                | 4.6±0.7  | 4.7±1.0  |
| Bladder               | 2.1±0.3  | 1.7±0.4  |
| Femoral Head Left     | 1.5±0.6  | 1.6±0.2* |
| Femoral Head<br>Right | 2.2±0.6  | 1.2±0.2  |

Table S4: Average scores for prostate organs at risk from 2 centres using deep learning contouring (DLC). Standard errors used. Centres scored based on agreement to a clinical contour. centre 2 scored 1=good agreement, 2=very minor differences, 3=minor differences, 4=edits required, 5=moderate edits required, 6=major edits required, 7=gross error. Centre 4 scored 1=clinically acceptable, 2=clinically acceptable (but not quite as reviewing clinician would draw it), 3= requires minor adjustments to be clinically acceptable, 4=requires major adjustments to be clinically acceptable, 5= would be easier to start from scratch.

| Structure          | Average Score |          |
|--------------------|---------------|----------|
|                    | Centre 2      | Centre 4 |
| Rectum             | 5.3±0.2       | 3.6±0.4  |
| Bladder            | 4.5±0.2       | 3.6±0.4  |
| Femoral Head Left  | 1.8±0.2       | 1.3±0.1  |
| Femoral Head Right | 1.5±0.1       | 1.2±0.1  |

Table S5: Average head and neck organ at risk contouring times for 4 centres using an existing clinical method and deep learning contouring (DLC). Standard errors used.

|                                                   | Average OAR contouring time (minutes) |          |           |          |
|---------------------------------------------------|---------------------------------------|----------|-----------|----------|
|                                                   | Centre 1                              | Centre 2 | Centre 3  | Centre 4 |
| Existing Method                                   | 18.3±1.5                              | 11.9±1.2 | 74.7±7.6  | 10.4±1.0 |
| DLC                                               | 10.0±0.8                              | 18.0±0.6 | 62.5±3.1  | 8.4±0.2  |
| Average time difference (negative is time saving) | -8.3±1.7                              | +6.1±1.3 | -12.2±8.2 | -2.0±1.0 |
| p-value                                           | <0.01                                 | 0.01     | 0.54      | 0.279    |

Table S6: Median dice similarity coefficient (DSC) for head and neck organs at risk for 4 centres comparing existing clinical contouring and deep learning contouring (DLC). Standard errors used. – indicates the structure was not analysed by that centre

|                            | <b>DSC</b>      |                 |                 |                 |
|----------------------------|-----------------|-----------------|-----------------|-----------------|
|                            | <b>Centre 1</b> | <b>Centre 2</b> | <b>Centre 3</b> | <b>Centre 4</b> |
| <b>Brainstem</b>           | 0.78±0.03       | 0.81±0.01       | -               | 0.82±0.02       |
| <b>Mandible</b>            | 0.86±0.03       | 0.90±0.01       | 0.85±0.01       | -               |
| <b>Parotid Left</b>        | 0.71±0.05       | 0.82±0.02       | 0.77±0.03       | 0.80±0.01       |
| <b>Parotid Right</b>       | 0.75±0.03       | 0.85±0.01       | 0.72±0.02       | 0.80±0.01       |
| <b>Spinal Cord</b>         | 0.72±0.05       | 0.69±0.05       | -               | 0.80±0.02       |
| <b>Submandibular Left</b>  | 0.51±0.09       | -               | 0.71±0.03       | -               |
| <b>Submandibular Right</b> | 0.64±0.09       | -               | 0.67±0.03       | -               |
| <b>Larynx</b>              | 0.66±0.06       | -               | -               | -               |
| <b>Oral Cavity</b>         | 0.77±0.03       | -               | -               | -               |

Table S7: Median distance to agreement (DTA) for head and neck organs at risk 3 centres comparing the existing clinical contouring and deep learning contouring (DLC). Standard errors used. – indicates the structure was not analysed by that centre.

|                            | DTA (mm) |          |          |
|----------------------------|----------|----------|----------|
|                            | Centre 1 | Centre 2 | Centre 4 |
| <b>Brainstem</b>           | 2.7±0.4  | 1.6±0.2  | 1.5 ±0.2 |
| <b>Mandible</b>            | 1.6±0.6  | 0.6±0.1  | -        |
| <b>Parotid Left</b>        | 3.3±0.9  | 2.2±0.6  | 2.2±0.1  |
| <b>Parotid Right</b>       | 2.8±0.4  | 1.9±0.5  | 2.5±0.1  |
| <b>Spinal Cord</b>         | 1.6±4.2  | 1.0±0.2  | 2.5±0.2  |
| <b>Submandibular Left</b>  | 4.0±0.9  | -        | -        |
| <b>Submandibular Right</b> | 2.6±0.9  | -        | -        |
| <b>Larynx</b>              | 3.5±4.1  | -        | -        |
| <b>Oral cavity</b>         | 5.2±0.6  | -        | -        |

Table S8: Average scores for head and neck organs at risk from 3 centres using deep learning contouring (DLC). Standard errors used. Centres scored based on agreement to a clinical contour. Centres 1 and 2 scored 1=good agreement, 2=very minor differences, 3=minor differences, 4=edits required, 5=moderate edits required, 6=major edits required, 7=gross error. Centre 4 scored 1=clinically acceptable, 2=clinically acceptable (but not quite as reviewing clinician would draw it), 3=requires minor adjustments to be clinically acceptable, 4=requires major adjustments to be clinically acceptable, 5= would be easier to start from scratch.

|                            | <b>Centre 1</b> | <b>Centre 2</b> | <b>Centre 4</b> |
|----------------------------|-----------------|-----------------|-----------------|
| <b>Brainstem</b>           | 4.9             | 4.0±0.2         | 3.4±0.2         |
| <b>Mandible</b>            | 3.0             | 3.9±0.2         | -               |
| <b>Parotid Left</b>        | 4.2             | 2.1±0.2         | 2.4±0.2         |
| <b>Parotid Right</b>       | 3.9             | 2.1±0.2         | 2.5±0.2         |
| <b>Spinal Cord</b>         | 3.1             | 2.3±0.2         | 2.4±0.2         |
| <b>Submandibular Left</b>  | 4.7             | -               | -               |
| <b>Submandibular Right</b> | 5.7             | -               | -               |
| <b>Larynx</b>              | 5.3             | -               | -               |
| <b>Oral Cavity</b>         | 4.8             | -               | -               |

Table S9: Median dice similarity coefficient (DSC) from inter-observer comparisons using manual contouring and deep learning contouring (DLC) for head and neck organs at risk. P-values from a Wilcoxon signed rank test.

|                     | <b>Median DSC</b> |            | <b>p-value</b> |
|---------------------|-------------------|------------|----------------|
|                     | <b>Manual</b>     | <b>DLC</b> |                |
| <b>Brainstem</b>    | 0.78±0.03         | 0.93±0.01  | <0.01          |
| <b>Larynx</b>       | 0.79±0.02         | 0.83±0.01  | 0.01           |
| <b>Left SMG</b>     | 0.80±0.02         | 0.89±0.04  | <0.01          |
| <b>Left parotid</b> | 0.84±0.01         | 0.92±0.02  | <0.01          |

Table S10: Median distance to agreement (DTA) from inter-observer comparisons using manual contouring and deep learning contouring (DLC) for head and neck organs at risk. P-values from a Wilcoxon signed rank test.

|                     | Median DTA (mm) |         | p-value |
|---------------------|-----------------|---------|---------|
|                     | Manual          | DLC     |         |
| <b>Brainstem</b>    | 2.2±0.8         | 0.9±0.1 | <0.01   |
| <b>Larynx</b>       | 1.9±0.2         | 1.8±0.1 | 0.699   |
| <b>Left SMG</b>     | 1.1±0.1         | 0.7±0.1 | <0.01   |
| <b>Left parotid</b> | 1.4±0.1         | 0.9±0.1 | <0.01   |

Table S11: Mean dice similarity coefficient (DSC) for prostate organs at risk from the study. Standard errors used.

| Structure                 | Centre    |           |
|---------------------------|-----------|-----------|
|                           | Centre 1  | Centre 2  |
| <b>Rectum</b>             | 0.58±0.05 | 0.71±0.02 |
| <b>Bladder</b>            | 0.84±0.01 | 0.82±0.02 |
| <b>Femoral Head Left</b>  | 0.90±0.08 | 0.82±0.01 |
| <b>Femoral Head Right</b> | 0.89±0.03 | 0.92±0.01 |
